# Supplementary material for: Rational design of a graphitic carbon nitride catalytic–biocatalytic system as a photocatalytic platform for solar fine chemical production from CO2
Source: Royal Society of Chemistry journal article supplement (doi:10.1039/d2re00079b), 2022-01-01
Supplement: d2re00079b1.pdf [file d2re00079b1.pdf]

## Electronic Supplementary Information (ESI)

### **Rational Design of graphitic Carbon Nitride Catalytic-Biocatalytic As a Photocatalytic Platform for Solar Fine Chemical Production From CO<sub>2</sub>**

Satyam Singh,<sup>a</sup> Rajesh Kumar Yadav,<sup>a\*</sup> Tae Wu Kim,<sup>b\*</sup> Chandani Singh,<sup>a</sup> Pooja Singh<sup>a</sup>, Atul P. Singh,<sup>c</sup> Alok Kumar Singh,<sup>d</sup> Atresh Kumar Singh,<sup>d</sup> Jin Ook Baeg,<sup>e\*</sup> Sarvesh Kumar Gupta<sup>f</sup>

---

<sup>a</sup> Department of Chemistry and Environmental Science, Madan Mohan Malaviya University of Technology, Gorakhpur, 273010, (U.P.), India. \*Email: [rajeshkr\\_yadav2003@yahoo.co.in](mailto:rajeshkr_yadav2003@yahoo.co.in).

<sup>b</sup> Department of Chemistry, Mokpo National University, Muan-gun, Jeollanam-do, 58554, Republic of Korea. \*Email: [twkim@mokpo.ac.kr](mailto:twkim@mokpo.ac.kr).

<sup>c</sup> Department of Chemistry, Chandigarh University, Mohali, 140413, Punjab, India.

<sup>d</sup> Department of Chemistry, DeenDayalUpadhaya University, Gorakhpur.

<sup>e</sup> Korea Research Institute of Chemical Technology, South Korea. \*Email: [jobaeg@kRICT.re.kr](mailto:jobaeg@kRICT.re.kr)

<sup>f</sup> Nanoionics and Energy Storage Laboratory (NanoESL), Department of Physics and Material Science, Madan Mohan Malaviya University of Technology, Gorakhpur (U. P.), India.

---

## Contents

|                                                           |    |
|-----------------------------------------------------------|----|
| 1. General remarks.....                                   | S3 |
| 2. Instruments and measurements.....                      | S3 |
| 3. Synthesis of AQBCN photocatalyst.....                  | S4 |
| 4. SEM image of AQ monomer.....                           | S5 |
| 5. X-ray diffraction pattern of AQ monomer.....           | S5 |
| 6. Energy-dispersive X-ray spectroscopy.....              | S6 |
| 7. Particle size studies.....                             | S6 |
| 8. Zeta potential studies.....                            | S7 |
| 9. UV-Vis diffuse reflectance spectra.....                | S7 |
| 10. Reusability experiment of AQBCN photocatalyst.....    | S8 |
| 11. Characterization of recycled AQBCN photocatalyst..... | S8 |

## 1. General remarks

All chemicals such as 1,4-diaminoanthraquinone, Urea, Pentamethylcyclopentadienyl rhodium (III) dichloride dimer, 2, 2'-bipyridyl, diethyl ether, NAD<sup>+</sup>, NADP<sup>+</sup>, ascorbic acid (AsA), and F<sub>ate</sub>DH (formate dehydrogenase) were purchased from Sigma-Aldrich and used without further purification

## 2. Instruments and measurements

Diffuse reflectance spectra (DRS) were recorded on the Shimadzu UV-1800 spectrometer. Fourier transform infrared spectroscopy (FTIR) spectra were obtained on a Nicole 6700 (made by Thermo Scientific, USA). The test specimen was prepared by the KBr-disk method. A powder X-ray diffractometer (D8 Advance Eco made by Bruker, Germany) was used for crystallinity. Scanning electron microscope (SEM) images and electron dispersive X-ray spectroscopy (EDS) were obtained on JSM 6490 LV (made by JEOL, Japan). Nano-zetasizer (NZS90) was used for zeta-potential and particle size studies. Laser power-dependent PL studies were performed using a 405 nm (3.06 eV) diode laser (Cube, coherent) equipped with a cooled charge-coupled (CCD) detector (Princeton Instruments, PIXIS 100B). High-performance liquid chromatograph (HPLC) used for the analysis of the production of formic acid (Model: LC-20AP, made: Shimadzu, Japan).

### 3. Synthesis of AQBCN photocatalyst

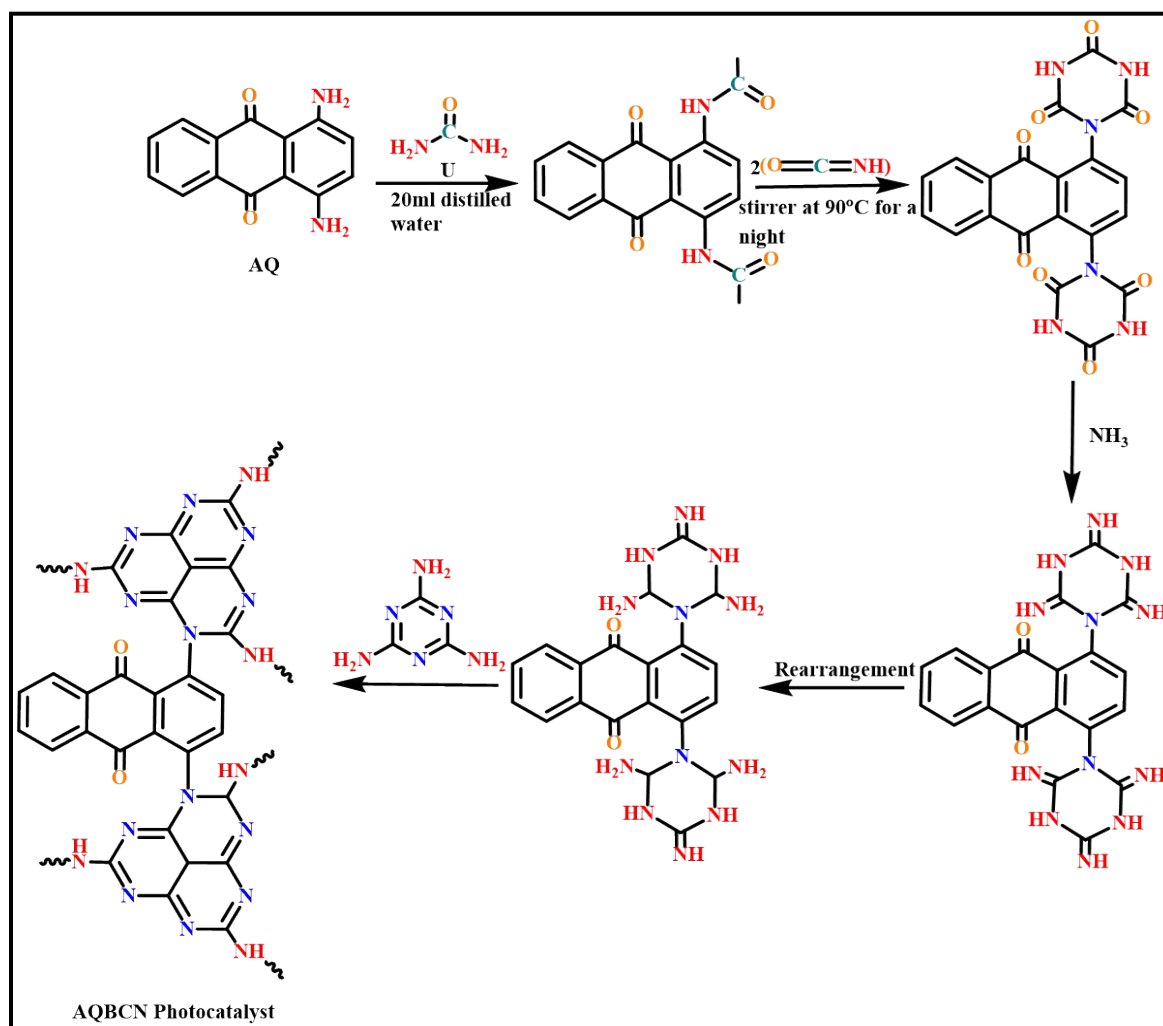

**Scheme S1.** Synthesis of AQBCN photocatalyst using AQ and U via copolymerization method.

#### 4. XRD images of AQ monomer

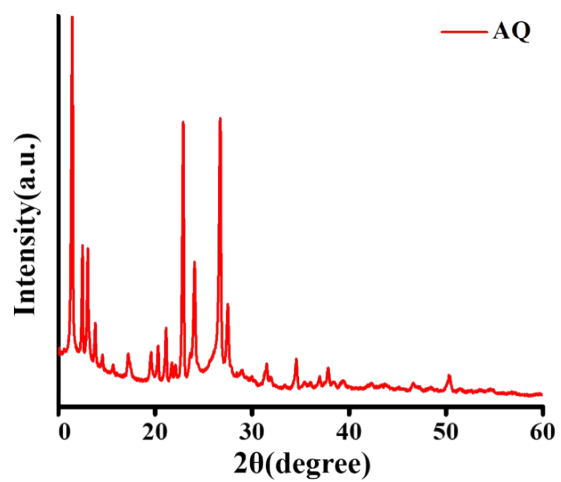

**Fig. S1.** X-ray diffraction pattern of AQ monomer.

#### 5. SEM image of AQ monomer

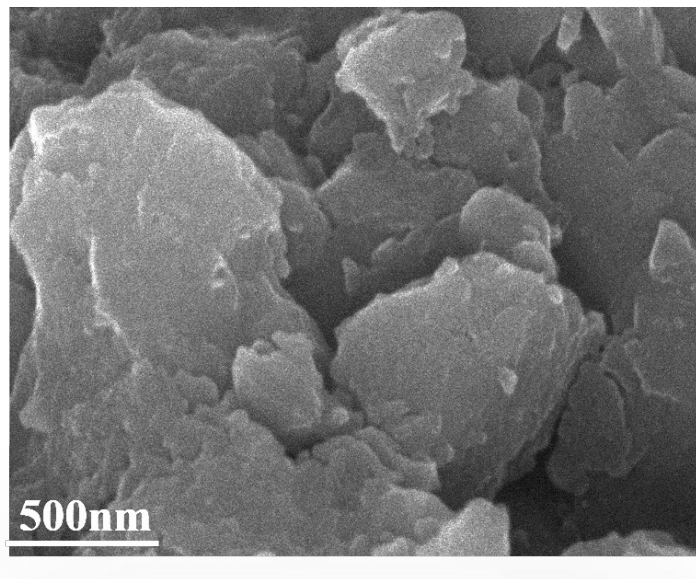

**Fig. S2.** SEM image of AQ monomer at 500nm.

6. Energy-dispersive X-ray spectroscopy studies

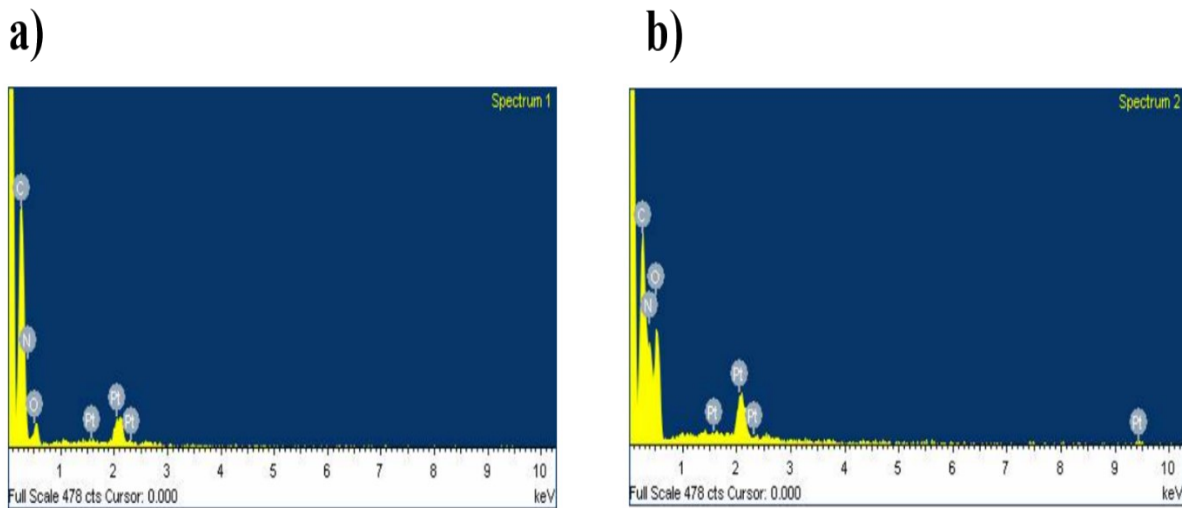

Fig. S3. Energy-dispersive X-ray spectroscopy of a) AQ, and b) AQBCN photocatalyst.

7. Particle size studies

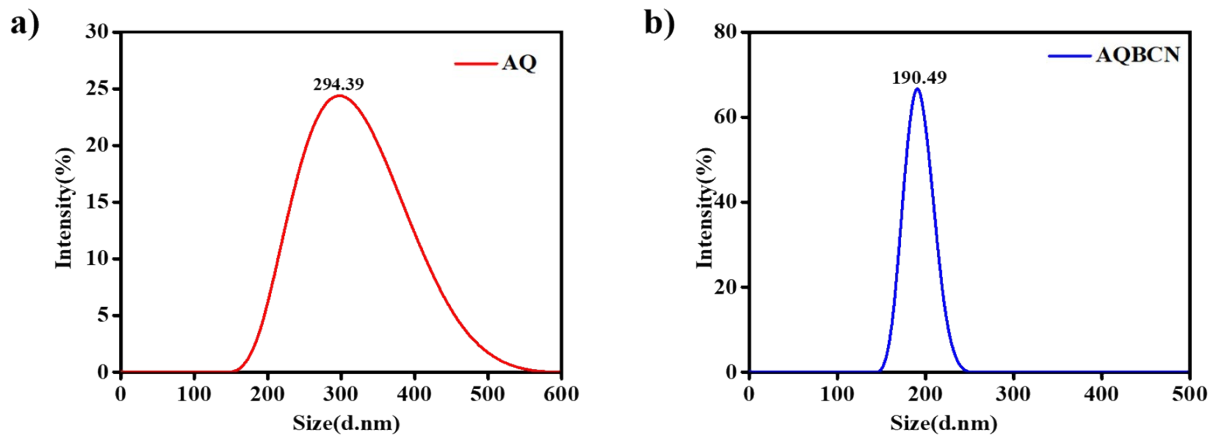

Fig. S4. Particle Size studies of a) AQ monomer, and b) AQBCN photocatalyst

## 8. Zeta potential studies

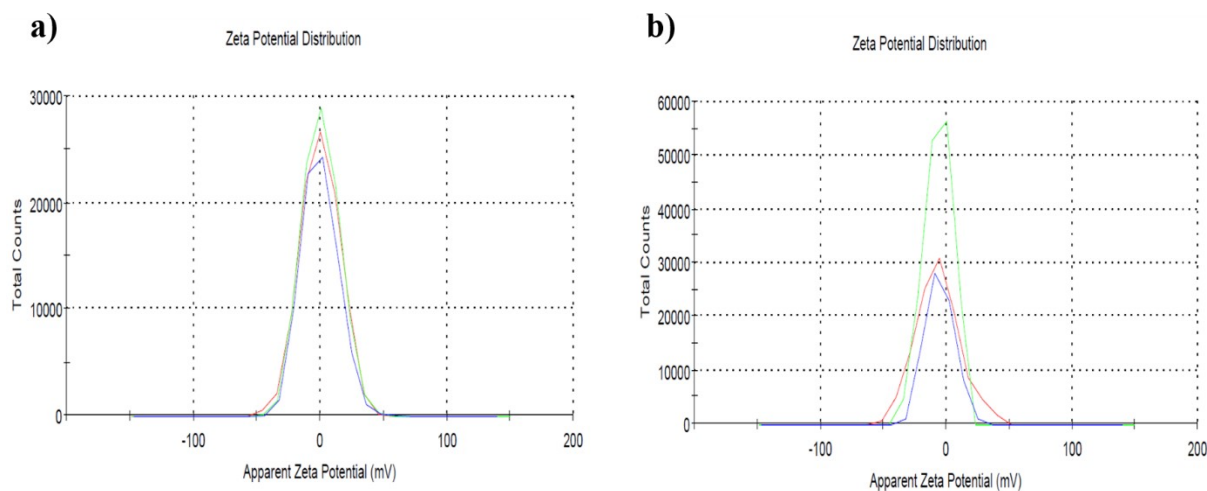

Fig. S5. Zeta potential studies of (a) AQ monomer(-0.207mV) and (b) AQBCN photocatalyst(-0.501mV).

## 9. Diffuse reflectance spectra (DRS)

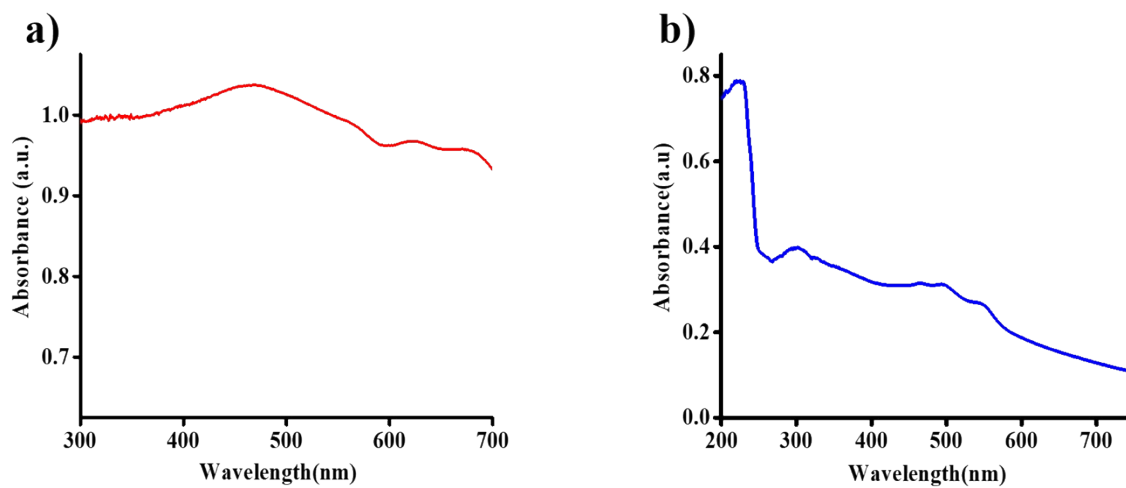

Fig. S6. UV-Vis diffuse reflectance spectra (DRS) (a) AQ and, (b) AQBCN photocatalyst.

## 10. Reusability experiment of AQBCN photocatalyst

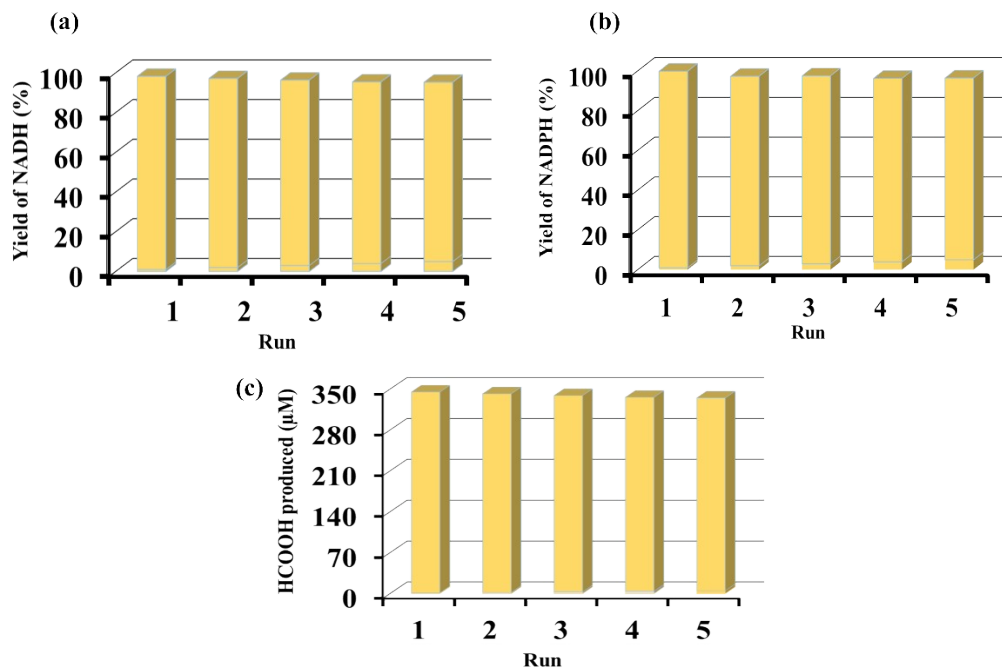

**Fig.S7.** Recycling experiments for 1,4-NADH/NADPH regeneration and HCOOH production from CO<sub>2</sub>. The reaction medium contains (a) 1,4-NADH regeneration [ $\beta$ -NAD<sup>+</sup> (1.24  $\mu$ mol), AsA (0.1mmol), CpM complex (0.62  $\mu$ mol), and AQBCN photocatalyst (0.5mg) in 3.1 mL of sodium phosphate buffer (100 mM, pH~ 7.0)], (b) 1,4-NADPH regeneration [ $\beta$ -NADP<sup>+</sup> (1.24  $\mu$ mol), AsA (0.1mmol), CpM complex (0.62  $\mu$ mol), and AQBCN photocatalyst (0.5mg) in 3.1 mL of sodium phosphate buffer (100 mM, pH 7.0)] and (c) HCOOH production from CO<sub>2</sub> under solar light [ $\beta$ -NAD<sup>+</sup> (1.24  $\mu$ mol), AsA (0.1mmol), CpM (0.62  $\mu$ mol), F<sub>ate</sub>DH (3 units) and AQBCN photocatalyst (0.5mg) in 3.1 mL of sodium phosphate buffer (100 mM, pH 7.0)].

## 11. Characterization of recycled AQBCN photocatalyst

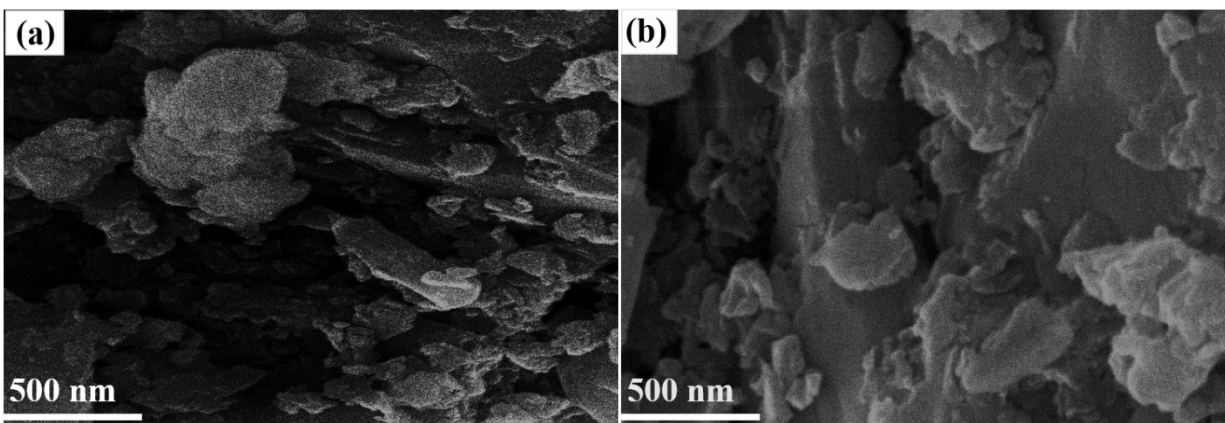

**Fig. S8.** SEM images of AQBCN photocatalyst (a) before recycling experiment (b) after the recycling experiment of HCOOH production.
